# Supplementary material for: Clustering of ABCB1 and CYP2C19 Genetic Variants Predicts Risk of Major Bleeding and Thrombotic Events in Elderly Patients with Acute Coronary Syndrome Receiving Dual Antiplatelet Therapy with Aspirin and Clopidogrel
Source: Springer Nature journal article supplement (doi:10.1007/s40266-018-0555-1), 2018-06-23
Supplement: MOESM1 [file 15875098]

**Electronic Supplementary Material**

***Drugs & Aging***

**Clustering of ABCB1 and CYP2C19 genetic variants predicts risk of major bleeding and thrombotic events in elderly patients with acute coronary syndrome receiving dual antiplatelet therapy with aspirin and clopidogrel**

Roberta Galeazzi*, Fabiola Olivieri*, Liana Spazzafumo*, Giuseppina Rose, Alberto Montesanto, Simona

Giovagnetti, Sara Cecchini, Gelsomina Malatesta, Raffaele Di Pillo and Roberto Antonicelli

*These authors contributed equally

Corresponding author:

Gelsomina Malatesta, M.D,

Cardiology Unit, INRCA National Institute, Ancona, Via della Montagnola 81 - 64125 Ancona, Italy.

Ph: +39 071 8003202, Fax: +39 071 8003203; e-mail: [g.malaesta@inrca.it](mailto:g.malaesta@inrca.it)

| **CYP2C19681GA2** | **CYP2C19806CT17** | **ABCB13435CT** | **Phenotype metabolizer status** |
| --- | --- | --- | --- |
| *1/*1 | *1/*1 | T/T | poor |
| *1/*2 | *1/*1 | C/C | poor |
| *1/*1 | *1/*17 | T/T | poor |
| *1/*1 | *17/*17 | T/T | ultra rapid |
| *1/*1 | *1/*1 | C/C | extensive |
| *1/*2 | *1/*17 | T/T | poor |
| *1/*1 | *1/*1 | C/T | extensive |
| *1/*1 | *1/*1 | T/T | poor |
| *1/*1 | *1/*1 | T/T | poor |
| *1/*2 | *17/*17 | C/C | ultra rapid |
| *1/*2 | *1/*1 | C/C | poor |
| *1/*2 | *1/*1 | C/C | poor |
| *2/*2 | *17/*17 | T/T | poor |
| *1/*1 | *1/*1 | C/T | extensive |
| *1/*1 | *1/*1 | C/T | extensive |
| *2/*2 | *1/*17 | T/T | poor |
| *1/*2 | *1/*1 | C/T | poor |
| *1/*2 | *1/*1 | C/C | poor |
| *2/*2 | *1/*1 | C/C | poor |
| *1/*1 | *1/*17 | T/T | poor |
| *1/*1 | *17/*17 | C/C | ultra rapid |
| *1/*1 | *1/*1 | C/C | extensive |
| *1/*1 | *17/*17 | C/C | ultra rapid |
| *2/*2 | *17/*17 | C/T | extensive |
| *1/*2 | *1/*1 | C/C | poor |
| *1/*2 | *1/*1 | C/C | poor |
| *1/*1 | *1/*1 | C/C | extensive |
| *1/*1 | *1/*1 | C/C | extensive |
| *1/*1 | *1/*1 | T/T | poor |
| *1/*2 | *1/*1 | C/C | poor |
| *1/*2 | *1/*1 | C/C | poor |
| *2/*2 | *17/*17 | C/C | extensive |
| *1/*1 | *17/*17 | C/T | ultra rapid |
| *1/*1 | *1/*17 | C/C | ultra rapid |
| *1/*1 | *1/*17 | C/T | ultra rapid |
| *1/*1 | *1/*1 | C/T | extensive |
| *1/*2 | *1/*1 | C/C | poor |
| *1/*2 | *1/*1 | C/C | poor |
| *2/*2 | *1/*1 | T/T | poor |
| *1/*1 | *1/*1 | C/T | extensive |
| *1/*1 | *1/*17 | T/T | poor |
| *1/*1 | *1/*1 | C/T | extensive |
| *1/*1 | *1/*1 | T/T | poor |
| *1/*1 | *17/*17 | C/T | ultra rapid |
| *1/*2 | *1/*1 | C/C | poor |
| *1/*2 | *1/*1 | C/C | poor |
| *1/*1 | *1/*17 | C/C | ultra rapid |
| *1/*1 | *17/*17 | T/T | ultra rapid |
| *2/*2 | *1/*1 | C/C | poor |
| *1/*1 | *1/*1 | C/C | extensive |
| *1/*1 | *17/*17 | C/T | ultra rapid |
| *2/*2 | *1/*17 | C/C | poor |
| *1/*1 | *17/*17 | C/C | ultra rapid |
| *1/*2 | *1/*1 | C/T | poor |
| *2/*2 | *1/*1 | C/C | poor |
| *1/*1 | *1/*1 | C/C | extensive |
| *1/*1 | *1/*1 | T/T | poor |
| *1/*1 | *1/*1 | T/T | poor |
| *1/*1 | *1/*1 | C/T | extensive |
| *1/*1 | *1/*17 | C/C | ultra rapid |
| *1/*2 | *1/*1 | C/C | poor |
| *1/*2 | *1/*1 | C/C | poor |
| *1/*2 | *1/*1 | C/C | poor |
| *1/*1 | *17/*17 | T/T | ultra rapid |
| *1/*1 | *1/*1 | C/T | extensive |
| *2/*2 | *1/*1 | C/T | poor |
| *1/*1 | *1/*17 | C/C | ultra rapid |
| *1/*1 | *1/*17 | C/T | ultra rapid |
| *1/*1 | *1/*1 | T/T | poor |
| *1/*2 | *1/*1 | C/C | poor |
| *1/*1 | *17/*17 | T/T | ultra rapid |
| *1/*1 | *1/*17 | C/C | ultra rapid |
| *1/*2 | *1/*1 | C/C | poor |
| *1/*2 | *1/*1 | C/C | poor |
| *1/*1 | *1/*1 | T/T | poor |
| *1/*2 | *1/*17 | C/T | poor |
| *1/*2 | *1/*1 | C/C | poor |
| *1/*2 | *1/*1 | C/C | poor |
| *1/*1 | *1/*1 | T/T | poor |
| *1/*1 | *1/*1 | T/T | poor |
| *2/*2 | *1/*1 | C/C | poor |
| *1/*1 | *1/*17 | C/C | ultra rapid |
| *1/*1 | *17/*17 | C/C | ultra rapid |
| *1/*1 | *1/*1 | C/T | extensive |
| *1/*2 | *1/*1 | C/C | poor |
| *1/*1 | *17/*17 | C/C | ultra rapid |
| *1/*1 | *1/*1 | C/T | extensive |
| *2/*2 | *1/*1 | C/T | poor |
| *1/*2 | *1/*1 | C/C | poor |
| *1/*2 | *1/*1 | C/C | poor |
| *1/*1 | *1/*1 | T/T | poor |
| *1/*1 | *1/*1 | C/C | extensive |
| *1/*2 | *1/*1 | C/T | poor |
| *1/*1 | *1/*17 | C/C | ultra rapid |
| *1/*1 | *1/*1 | C/C | extensive |
| *1/*2 | *1/*1 | C/C | poor |
| *2/*2 | *1/*1 | T/T | poor |
| *1/*2 | *1/*1 | C/C | poor |
| *1/*1 | *1/*1 | C/C | extensive |
| *1/*1 | *1/*1 | C/C | extensive |
